# Supplementary material for: The influence of H2O2 on the properties of CeO2-ZrO2 mixed oxides
Source: Springer Nature journal article supplement (doi:10.1007/s10853-017-0765-7), 2017-01-26
Supplement: MOESM1 [file 12021786]

**Supplementary material 1 (S1)**

| **Table 5** Specific surface areas (BET), pore volumes and mean pore radii of the fresh and aged samples | | | | | | |
| --- | --- | --- | --- | --- | --- | --- |
| Sample | Surface area (m2/g) | | Pore vol.(cm3 g-1) | | Average pore radius (nm) | |
| 600 °C | 1000 °C | 600 °C | 1000 °C | 600 °C | 1000 °C |
| CZ-0 | 76 | 17 | 0.18 | 0.12 | 4.7 | 14.0 |
| CZ-0.5 | 96 | 21 | 0.25 | 0.12 | 5.2 | 11.1 |
| CZ-1 | 83 | 23 | 0.24 | 0.11 | 5.7 | 9.1 |
| CZ-2 | 95 | 24 | 0.25 | 0.11 | 5.2 | 8.8 |
| CZ-5 | 95 | 17 | 0.25 | 0.08 | 5.3 | 9.6 |
